# Supplementary material for: Electron detachment dynamics of O2−(H2O): direct ab initio molecular dynamics (AIMD) approach
Source: Royal Society of Chemistry journal article supplement (doi:10.1039/c3ra45753b), 2013-11-06
Supplement: c3ra45753b.pdf [file c3ra45753b.pdf]

## SUPPORTING INFORMATION

### *Electron Detachment Dynamics of O<sub>2</sub>(H<sub>2</sub>O):*

#### *Direct Ab initio Molecular Dynamics (AIMD) Approach*

Hiroto TACHIKAWA\*

*Division of Materials Chemistry, Graduate School of Engineering,*

*Hokkaido University, Sapporo 060-8628, JAPAN*

#### 1. Electron detachment dynamics of O<sub>2</sub><sup>-</sup>(H<sub>2</sub>O) with C<sub>2v</sub> symmetry.

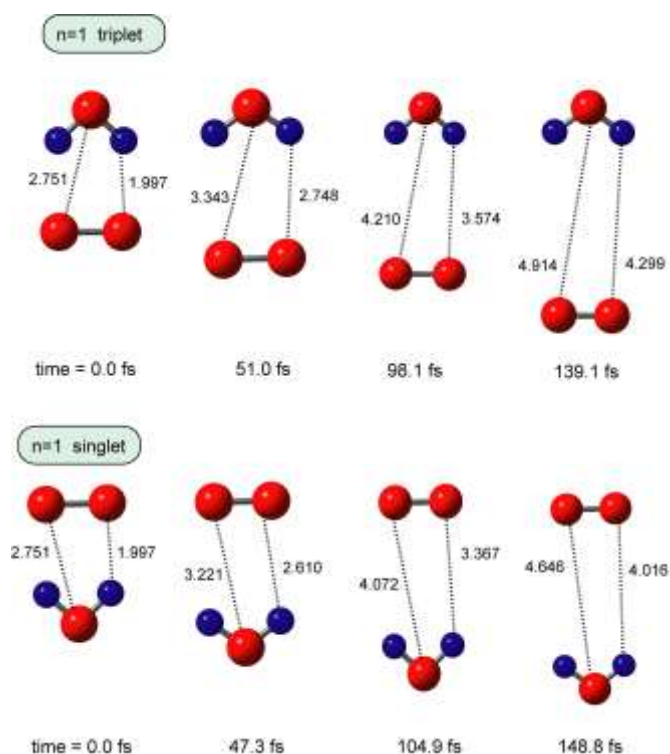

**Figure S1.** Electron detachment dynamics of O<sub>2</sub><sup>-</sup>(H<sub>2</sub>O) with C<sub>2v</sub> on *triplet* and *singlet* potential energy surfaces. The values indicate intermolecular distances (in Å). Dynamics calculation were carried out at the MP2/6-311++G(d,p) level. The trajectory was started from the optimized geometry of O<sub>2</sub><sup>-</sup>(H<sub>2</sub>O) with C<sub>2v</sub> structure.

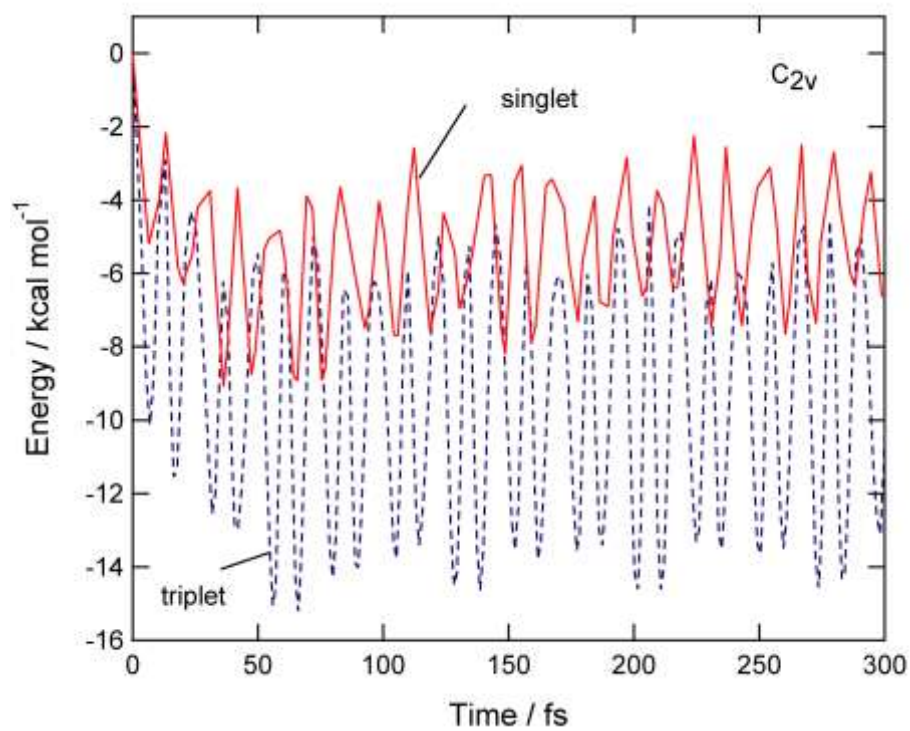

**Figure S2.** Time evolutions of potential energies of O<sub>2</sub>(H<sub>2</sub>O) on singlet and triplet state PESs.

2. Effects of initial structures on the reaction dynamics.

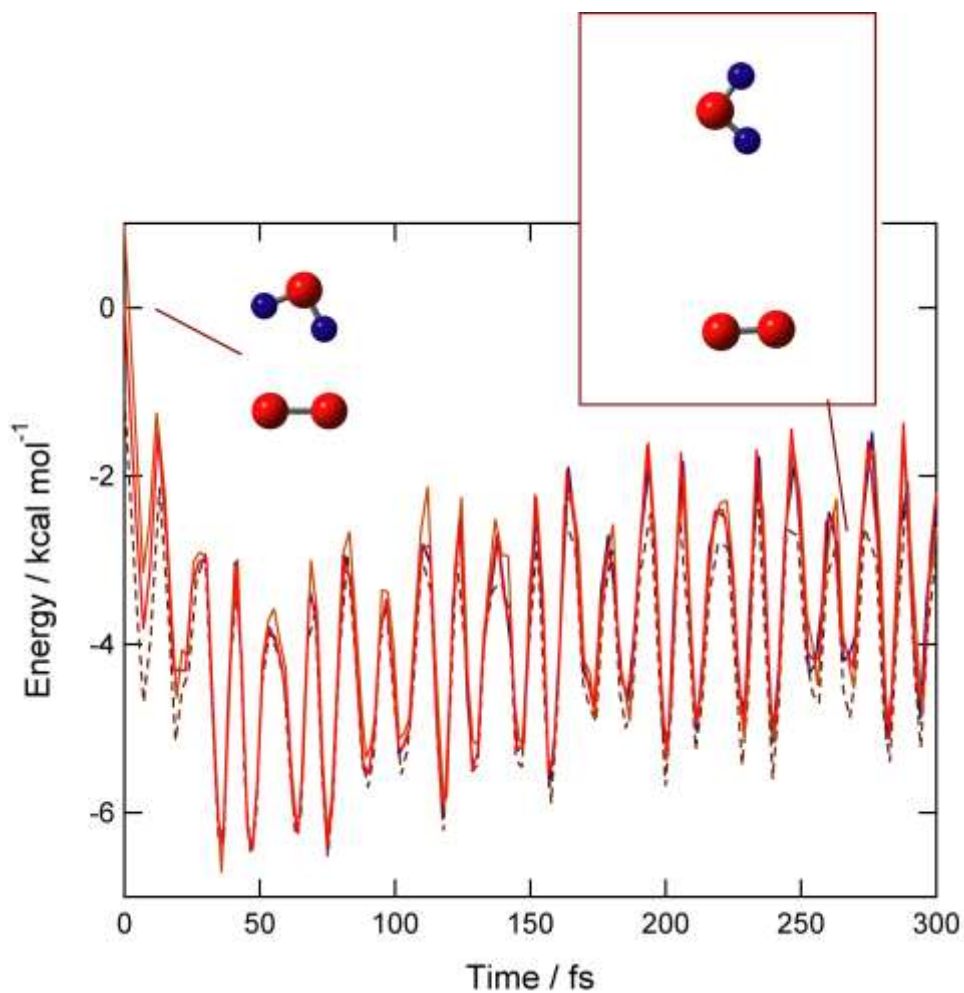

**Figure 3.** Effects of initial configurations on the time evolutions of potential energies of  $O_2(H_2O)$  on singlet state PES.
